# Supplementary material for: Molecular Diversity of Human Respiratory Syncytial Virus before and during the COVID-19 Pandemic in Two Neighboring Japanese Cities
Source: PubMed Central journal article supplement (PMC10433803; doi:10.1128/spectrum.02606-22), 2023-07-06
Supplement: spectrum.02606-22-s0001.pdf [file spectrum.02606-22-s0001.pdf]

1 **Supplemental Material**

2 **FIGURES**

3 **Fig. S1.** HRSV-A phylogenetic tree constructed from the sequences of the second HVR  
4 of *G* using the maximum likelihood method with the best model (GTR + G).

5 A phylogenetic tree was constructed using the maximum likelihood method with 1000  
6 iterations for the bootstrap using MEGA version 7.0.26. Only bootstrap values greater  
7 than 70% are shown. The evolutionary distances were computed using the p-distance  
8 method and the scale bar represents the number of nucleotide substitutions per site.  
9 Strains detected at Hospital O are shown in red and those detected at Hospital H are shown  
10 in blue. The strains circulating in different countries are shown in purple. The  
11 representative strains of each genotype are shown in green.

12

13

14

15

16

17

18

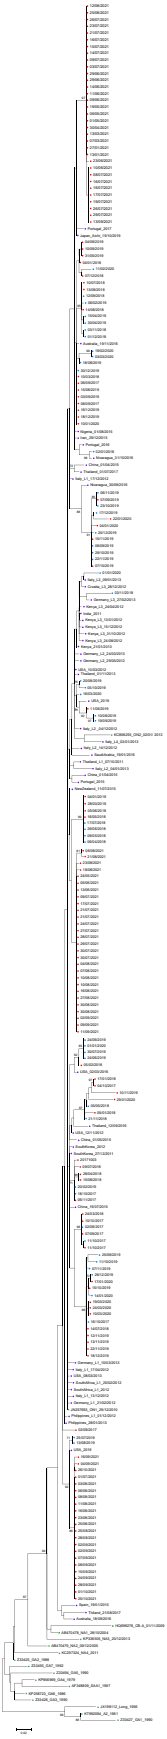

19 **Fig. S2.** Details of the time-scaled maximum clade credibility tree using the best model  
20 (GTR) of the second HVR of *G* from HRSV-A constructed using the Bayesian Markov  
21 chain Monte Carlo (MCMC) method under the exponential molecular clock. Only  
22 posterior probabilities greater than 0.8 are shown. Strains detected at Hospital O are  
23 shown in red and those detected at Hospital H are shown in blue. The strains circulating  
24 in different countries are shown in purple. Representative strains of each genotype are  
25 shown in green.

26

27

28

29

30

31

32

33

34

35

36

# HRSV-A

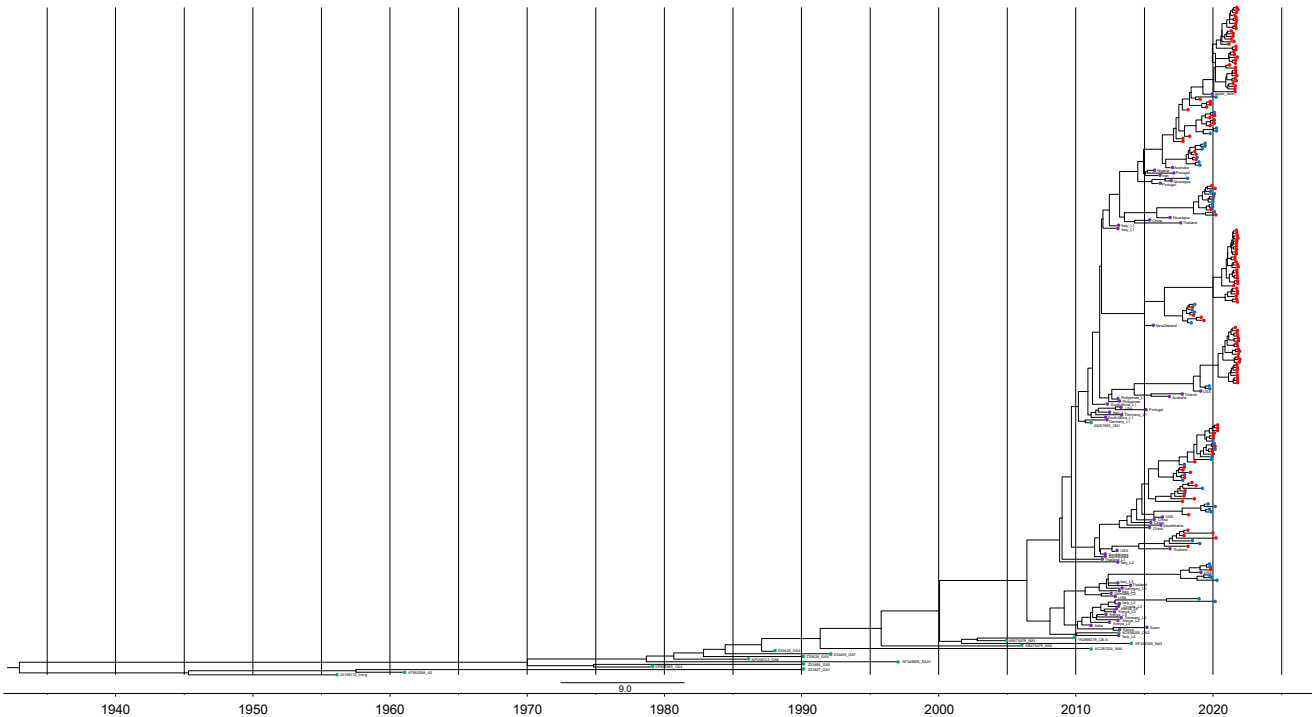

37 **Fig. S3.** HRSV-B phylogenetic tree constructed from sequences of the second HVR of *G*  
38 using the maximum likelihood method with the best model (GTR + G).

39 The phylogenetic tree was constructed using the maximum likelihood method with 1000  
40 iteration for the bootstrap using MEGA version 7.0.26. Only bootstrap values greater than  
41 70% are shown. Evolutionary distances were computed using the p-distance method and  
42 the scale bar represents the number of nucleotide substitutions per site. Strains detected  
43 at Hospital O are shown in red and those detected at Hospital H are shown in blue. The  
44 strains circulating in different countries are shown in purple. Representative strains of  
45 each genotype are shown in green.

46

47

48

49

50

51

52

53

54

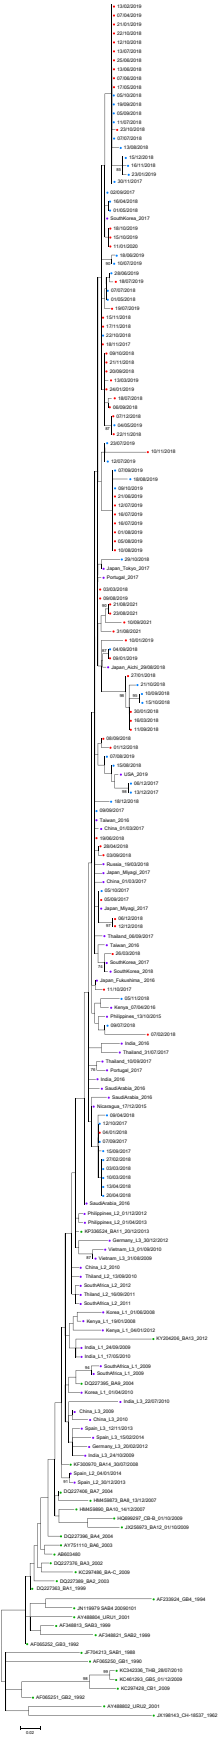

55 **Fig. S4.** Details of the time-scaled maximum clade credibility tree using the best model  
56 (GTR) of the second HVR of *G* from HRSV-B constructed using the Bayesian Markov  
57 chain Monte Carlo (MCMC) method under the exponential molecular clock. Only  
58 posterior probabilities greater than 0.8 are shown. Strains detected at Hospital O are  
59 shown in red and those detected at Hospital H are shown in blue. The strains circulating  
60 in different countries are shown in purple. Representative strains of each genotype are  
61 shown in green.

62

63

64

65

66

67

68

69

70

71

72

# HRSV-B

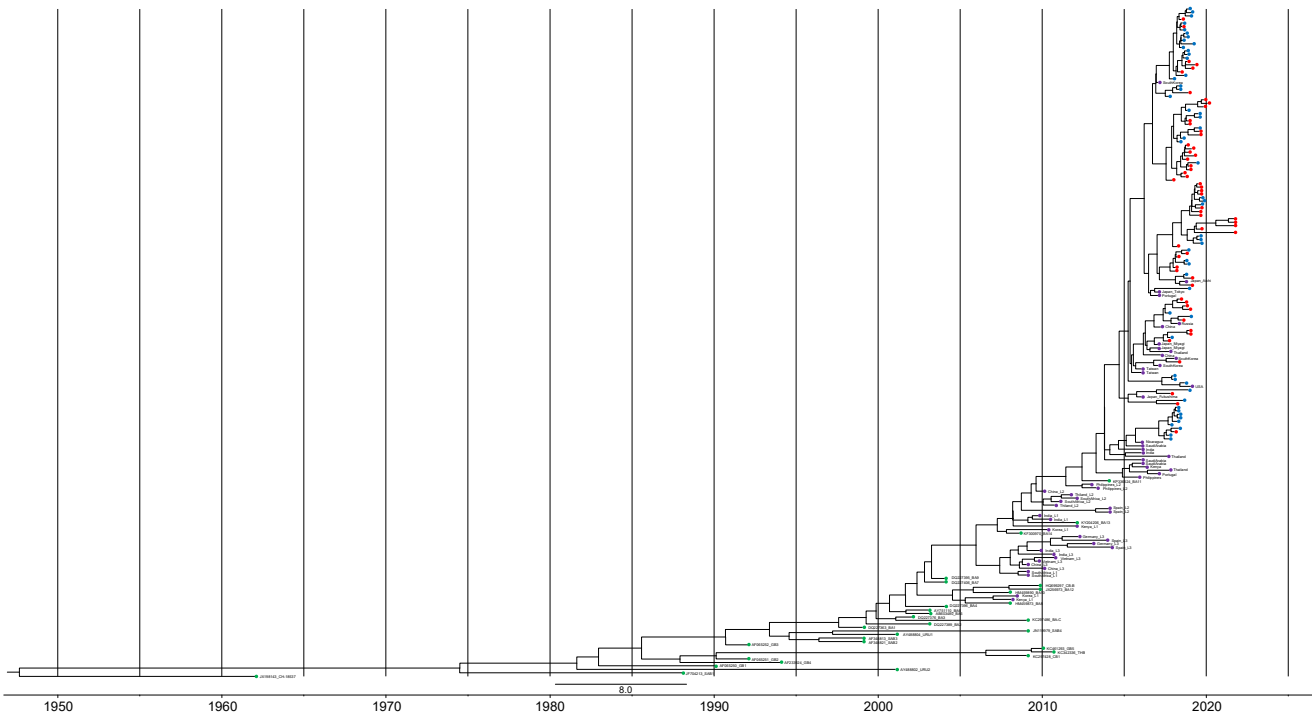



73 **TABLES**

74 **Table S1.** Evolutionary rates of the analyzed HRSV-A and HRSV-B strains.

| Subtype | Mean rate (95 % HPD)<br>(substitution/site/year)             |
|---------|--------------------------------------------------------------|
| HRSV-A  | $3.54 \times 10^{-3}$ ( $2.74\text{--}4.37 \times 10^{-3}$ ) |
| HRSV-B  | $6.02 \times 10^{-3}$ ( $4.56\text{--}7.42 \times 10^{-3}$ ) |

75

76 **Table S2.** Ratio of the same array and pairwise distance per cluster of HRSV-A and

77 HRSV-B detected at Hospital O in 2021.

| Cluster             | HRSV-A         |                |       | HRSV-B |
|---------------------|----------------|----------------|-------|--------|
|                     | 1              | 3              | 4     | 2      |
| Ratio of same array | 23/33 and 9/33 | 24/28 and 2/28 | 20/22 | 2/4    |
| Pairwise distance   | 0.006          | 0.012          | 0.006 | 0.02   |

78 Clinical strains of HRSV-A and HRSV-B in 2021 included several strains with exactly

79 the same sequence in each cluster, and the pairwise distance was also low.

80

81 **Table S3.** Pairwise distance of HRSV-A and HRSV-B clusters detected at Hospitals O

82 and H during 2017–21.

| Cluster           | HRSV-A |       |       |       |       |       |       |       |
|-------------------|--------|-------|-------|-------|-------|-------|-------|-------|
|                   | 1      | 2     | 3     | 4     | 5     | 6     | 7     | 8     |
| Pairwise distance | 0.042  | 0.027 | 0.027 | 0.012 | 0.054 | 0.051 | 0.030 | 0.042 |

83

| Cluster           | HRSV-B |       |       |       |       |       |
|-------------------|--------|-------|-------|-------|-------|-------|
|                   | 1      | 2     | 3     | 4     | 5     | 6     |
| Pairwise distance | 0.053  | 0.066 | 0.033 | 0.015 | 0.059 | 0.010 |

84

85 **Table S4.** Details of the sequences used for constructing phylogenetic trees using the  
86 maximum likelihood (ML) method, Bayesian Markov chain Monte Carlo (MCMC)  
87 method, and genome network analysis.

| <b>Table S4.</b> Details of the sequences used for constructing phylogenetic trees using the maximum likelihood (ML) method, Bayesian Markov chain Monte Carlo (MCMC) method, and genome network analysis. |                           |          |          |           |             |                  |
|------------------------------------------------------------------------------------------------------------------------------------------------------------------------------------------------------------|---------------------------|----------|----------|-----------|-------------|------------------|
| Accession Number                                                                                                                                                                                           | Country/Year of isolation | Subgroup | Genotype | ML method | MCMC method | Network analysis |
| KT992094                                                                                                                                                                                                   | Australia/1961            | A        |          | ✓         | ✓           |                  |
| JX198112                                                                                                                                                                                                   | USA/1956                  | A        |          | ✓         | ✓           |                  |
| Z33427                                                                                                                                                                                                     | Uruguay/1990              | A        | GA1      | ✓         | ✓           |                  |
| Z33425                                                                                                                                                                                                     | Uruguay/1988              | A        | GA2      | ✓         | ✓           |                  |
| Z33426                                                                                                                                                                                                     | Uruguay/1990              | A        | GA3      | ✓         | ✓           |                  |
| KP856969                                                                                                                                                                                                   | USA/1979                  | A        | GA4      | ✓         | ✓           |                  |
| Z33494                                                                                                                                                                                                     | Uruguay/1990              | A        | GA5      | ✓         | ✓           |                  |
| KP258723                                                                                                                                                                                                   | USA/1986                  | A        | GA6      | ✓         | ✓           |                  |
| Z33455                                                                                                                                                                                                     | Spain/1992                | A        | GA7      | ✓         | ✓           |                  |
| AF348809                                                                                                                                                                                                   | South Africa/1997         | A        | SSA1     | ✓         | ✓           |                  |
| AB470478                                                                                                                                                                                                   | Japan/2004                | A        | NA1      | ✓         | ✓           |                  |
| AB470479                                                                                                                                                                                                   | Japan/2005                | A        | NA2      | ✓         | ✓           |                  |
| KP336505                                                                                                                                                                                                   | China/2013                | A        | NA3      | ✓         | ✓           |                  |
| KC297324                                                                                                                                                                                                   | China/2011                | A        | NA4      | ✓         | ✓           |                  |
| HQ699278                                                                                                                                                                                                   | South Korea/2009          | A        | CB-A     | ✓         | ✓           |                  |
| JN257693                                                                                                                                                                                                   | Canada/2010               | A        | ON1      | ✓         | ✓           | ✓                |
| KC858255                                                                                                                                                                                                   | Italy/2013                | A        | ON2      | ✓         | ✓           | ✓                |
| JX198143                                                                                                                                                                                                   | USA/1962                  | B        |          | ✓         | ✓           |                  |
| JF704213                                                                                                                                                                                                   | South Africa/1998         | B        | SAB1     | ✓         | ✓           |                  |
| AF348821                                                                                                                                                                                                   | South Africa/1999         | B        | SAB2     | ✓         | ✓           |                  |
| AF348813                                                                                                                                                                                                   | South Africa/1999         | B        | SAB3     | ✓         | ✓           |                  |
| JN119979                                                                                                                                                                                                   | Cambodia/2009             | B        | SAB4     | ✓         | ✓           |                  |
| AY488804                                                                                                                                                                                                   | Uruguay/2001              | B        | URU1     | ✓         | ✓           |                  |

|          |                  |   |      |   |   |   |
|----------|------------------|---|------|---|---|---|
| AY488802 | Uruguay/2001     | B | URU2 | ✓ | ✓ |   |
| AF065250 | USA/1990         | B | GB1  | ✓ | ✓ |   |
| AF065251 | USA/1992         | B | GB2  | ✓ | ✓ |   |
| AF065252 | USA/1992         | B | GB3  | ✓ | ✓ |   |
| AF233924 | USA/1994         | B | GB4  | ✓ | ✓ |   |
| KC461293 | China/2009       | B | GB5  | ✓ | ✓ |   |
| DQ227363 | Argentina/1999   | B | BA1  | ✓ | ✓ |   |
| DQ227389 | Argentina/2003   | B | BA2  | ✓ | ✓ |   |
| DQ227376 | Argentina/2002   | B | BA3  | ✓ | ✓ |   |
| DQ227396 | Argentina/2004   | B | BA4  | ✓ | ✓ |   |
| AB603480 | Japan/2003       | B | BA5  | ✓ | ✓ |   |
| AY751110 | Belgium/2003     | B | BA6  | ✓ | ✓ |   |
| DQ227406 | Argentina/2004   | B | BA7  | ✓ | ✓ |   |
| HM459873 | Japan/2007       | B | BA8  | ✓ | ✓ |   |
| DQ227395 | Argentina/2004   | B | BA9  | ✓ | ✓ | ✓ |
| HM459890 | Japan/2007       | B | BA10 | ✓ | ✓ |   |
| KP336524 | China/2013       | B | BA11 | ✓ | ✓ |   |
| JX256973 | Malaysia/2009    | B | BA12 | ✓ | ✓ |   |
| KY204206 | Pakistan/2012    | B | BA13 | ✓ | ✓ |   |
| KF300970 | Panama/2008      | B | BA14 | ✓ | ✓ |   |
| KC297486 | China/2009       | B | BA-C | ✓ | ✓ |   |
| KC297428 | China/2009       | B | CB1  | ✓ | ✓ |   |
| HQ699297 | South Korea/2009 | B | CB-B | ✓ | ✓ |   |
| KC342336 | Thailand/2010    | B | THB  | ✓ | ✓ |   |
| MK634184 | South Korea/2012 | A | ON1  | ✓ | ✓ | ✓ |
| KY654518 | Philippines/2013 | A | ON1  | ✓ | ✓ | ✓ |
| JX627336 | South Korea/2011 | A | ON1  | ✓ | ✓ | ✓ |
| KU950651 | USA/2012         | A | ON1  | ✓ | ✓ | ✓ |
| KX765956 | New Zealand/2015 | A | ON1  | ✓ | ✓ | ✓ |
| LC530050 | Japan/2019       | A | ON1  | ✓ | ✓ | ✓ |
| MK749913 | Nicaragua/2016   | A | ON1  | ✓ | ✓ | ✓ |
| MN306031 | USA/2019         | A | ON1  | ✓ | ✓ | ✓ |
| MH181987 | Kenya/2013       | A | ON1  | ✓ | ✓ | ✓ |
| MK749886 | Nicaragua/2016   | A | ON1  | ✓ | ✓ | ✓ |

|          |                   |   |         |   |   |   |
|----------|-------------------|---|---------|---|---|---|
| MN630103 | USA/2016          | A | ON1     | ✓ | ✓ | ✓ |
| MN306048 | USA/2019          | A | ON1     | ✓ | ✓ | ✓ |
| KU950492 | USA/2012          | A | ON1     | ✓ | ✓ | ✓ |
| MH447954 | Thailand/2013     | A | ON1     | ✓ | ✓ | ✓ |
| KJ672448 | USA/2013          | A | ON1     | ✓ | ✓ | ✓ |
| KC731482 | India/2011        | A | ON1     | ✓ | ✓ | ✓ |
| MK749881 | Nicaragua/2015    | B | BA9     | ✓ | ✓ | ✓ |
| MN306044 | USA/2019          | B | BA9     | ✓ | ✓ | ✓ |
| LC385002 | Philippines/2015  | B | BA9     | ✓ | ✓ | ✓ |
| LC495297 | Japan/2018        | B | BA9     | ✓ | ✓ | ✓ |
| MN365581 | Kenya/2016        | B | BA9     | ✓ | ✓ | ✓ |
| LC488177 | Japan/2016        | B | BA9     | ✓ | ✓ | ✓ |
| JX912358 | Germany/2012      | A | ON1     | ✓ | ✓ | ✓ |
| JX912364 | Germany/2012      | A | ON1     | ✓ | ✓ | ✓ |
| KJ710375 | Germany/2013      | A | ON1     | ✓ | ✓ | ✓ |
| KJ710380 | Germany/2013      | A | ON1     | ✓ | ✓ | ✓ |
| KJ710396 | Germany/2013      | A | ON1     | ✓ | ✓ | ✓ |
| JX988443 | Italy/2012        | A | GA2     | ✓ | ✓ | ✓ |
| KC858199 | Italy/2012        | A | GA2/ON1 | ✓ | ✓ | ✓ |
| KC858208 | Italy/2012        | A | GA2/ON1 | ✓ | ✓ | ✓ |
| KC858249 | Italy/2012        | A | GA2/ON1 | ✓ | ✓ | ✓ |
| KC858250 | Italy/2012        | A | GA2/ON1 | ✓ | ✓ | ✓ |
| KC858211 | Italy/2013        | A | GA2/ON1 | ✓ | ✓ | ✓ |
| KC858222 | Italy/2013        | A | GA2/ON1 | ✓ | ✓ | ✓ |
| KC858256 | Italy/2013        | A | ON2     | ✓ | ✓ | ✓ |
| AB846651 | Philippines/2012  | A | ON1     | ✓ | ✓ | ✓ |
| KC476744 | South Africa/2012 | A | ON1     | ✓ | ✓ | ✓ |
| JX885730 | South Africa/2012 | A | ON1     | ✓ | ✓ | ✓ |
| KC342434 | Thailand/2011     | A | ON1     | ✓ | ✓ | ✓ |
| KF587941 | Kenya/2012        | A | ON1     | ✓ | ✓ | ✓ |
| KF587952 | Kenya/2012        | A | ON1     | ✓ | ✓ | ✓ |
| KF587961 | Kenya/2012        | A | ON1     | ✓ | ✓ | ✓ |
| KF587967 | Kenya/2012        | A | ON1     | ✓ | ✓ | ✓ |
| KF587976 | Kenya/2012        | A | ON1     | ✓ | ✓ | ✓ |

|          |                   |   |     |   |   |   |
|----------|-------------------|---|-----|---|---|---|
| KF057865 | Croatia/2012      | A | ON1 | ✓ | ✓ | ✓ |
| KU254628 | China/2015        | A | ON1 | ✓ | ✓ | ✓ |
| KU254631 | China/2015        | A | ON1 | ✓ | ✓ | ✓ |
| KU254636 | China/2015        | A | ON1 | ✓ | ✓ | ✓ |
| MH760610 | Australia/2016    | A | ON1 | ✓ | ✓ | ✓ |
| MN122463 | Portugal/2015     | A | ON1 | ✓ | ✓ | ✓ |
| MN122526 | Portugal/2016     | A | ON1 | ✓ | ✓ | ✓ |
| MN122553 | Portugal/2017     | A | ON1 | ✓ | ✓ | ✓ |
| MH174872 | Iran/2015         | A | ON1 | ✓ | ✓ | ✓ |
| KU736774 | Nigeria/2015      | A | ON1 | ✓ | ✓ | ✓ |
| MH447710 | Thailand/2017     | A | ON1 | ✓ | ✓ | ✓ |
| MH760638 | Australia/2016    | A | ON1 | ✓ | ✓ | ✓ |
| KT326803 | Spain/2015        | A | ON1 | ✓ | ✓ | ✓ |
| KX009687 | China/2015        | A | ON1 | ✓ | ✓ | ✓ |
| MH388034 | Saudi Arabia/2016 | A | ON1 | ✓ | ✓ | ✓ |
| MH447708 | Thailand/2016     | A | ON1 | ✓ | ✓ | ✓ |
| MH447714 | Thailand/2017     | A | ON1 | ✓ | ✓ | ✓ |
| KF246588 | India/2009        | B | BA9 | ✓ | ✓ | ✓ |
| KF246630 | India/2010        | B | BA9 | ✓ | ✓ | ✓ |
| HQ711811 | South Africa/2009 | B | BA9 | ✓ | ✓ | ✓ |
| KC476954 | South Africa/2009 | B | BA9 | ✓ | ✓ | ✓ |
| HQ699298 | Korea/2008        | B | BA9 | ✓ | ✓ | ✓ |
| HQ699290 | Korea/2010        | B | BA9 | ✓ | ✓ | ✓ |
| KF156570 | Kenya/2008        | B | BA9 | ✓ | ✓ | ✓ |
| KP862466 | Kenya/2012        | B | BA9 | ✓ | ✓ | ✓ |
| KM402711 | Spain/2013        | B | BA9 | ✓ | ✓ | ✓ |
| KM402675 | Spain/2014        | B | BA9 | ✓ | ✓ | ✓ |
| KM873461 | Philippines/2012  | B | BA9 | ✓ | ✓ | ✓ |
| KM873497 | Philippines/2013  | B | BA9 | ✓ | ✓ | ✓ |
| KC342339 | Thailand/2010     | B | BA9 | ✓ | ✓ | ✓ |
| KC342345 | Thailand/2011     | B | BA9 | ✓ | ✓ | ✓ |
| KC477035 | South Africa/2011 | B | BA9 | ✓ | ✓ | ✓ |
| KC477096 | South Africa/2012 | B | BA9 | ✓ | ✓ | ✓ |
| KC297457 | China/2010        | B | BA9 | ✓ | ✓ | ✓ |

|          |                   |   |     |   |   |   |
|----------|-------------------|---|-----|---|---|---|
| KJ939921 | Vietnam/2009      | B | BA9 | ✓ | ✓ | ✓ |
| JX079979 | Vietnam/2010      | B | BA9 | ✓ | ✓ | ✓ |
| KC297441 | China/2009        | B | BA9 | ✓ | ✓ | ✓ |
| KC297447 | China/2010        | B | BA9 | ✓ | ✓ | ✓ |
| KJ690596 | India/2009        | B | BA9 | ✓ | ✓ | ✓ |
| KF246602 | India/2010        | B | BA9 | ✓ | ✓ | ✓ |
| KM402683 | Spain/2013        | B | BA9 | ✓ | ✓ | ✓ |
| KM402745 | Spain/2014        | B | BA9 | ✓ | ✓ | ✓ |
| KJ710407 | Germany/2012      | B | BA9 | ✓ | ✓ | ✓ |
| JX967575 | Germany/2012      | B | BA9 | ✓ | ✓ | ✓ |
| MH447754 | Thailand/2017     | B | BA9 | ✓ | ✓ | ✓ |
| MH447779 | Thailand/2017     | B | BA9 | ✓ | ✓ | ✓ |
| MH447786 | Thailand/2017     | B | BA9 | ✓ | ✓ | ✓ |
| MN122639 | Portugal/2017     | B | BA9 | ✓ | ✓ | ✓ |
| MN122686 | Portugal/2017     | B | BA9 | ✓ | ✓ | ✓ |
| MG962341 | India/2016        | B | BA9 | ✓ | ✓ | ✓ |
| MH476342 | India/2016        | B | BA9 | ✓ | ✓ | ✓ |
| MK947336 | South Korea/2017  | B | BA9 | ✓ | ✓ | ✓ |
| MK947337 | South Korea/2017  | B | BA9 | ✓ | ✓ | ✓ |
| MK947352 | South Korea/2018  | B | BA9 | ✓ | ✓ | ✓ |
| LC474554 | Japan/2017        | B | BA9 | ✓ | ✓ | ✓ |
| LC474555 | Japan/2017        | B | BA9 | ✓ | ✓ | ✓ |
| MN163125 | China/2017        | B | BA9 | ✓ | ✓ | ✓ |
| MN163126 | China/2017        | B | BA9 | ✓ | ✓ | ✓ |
| MK481079 | Russia/2018       | B | BA9 | ✓ | ✓ | ✓ |
| LC324679 | Japan/2017        | B | BA9 | ✓ | ✓ | ✓ |
| MK361086 | Taiwan/2016       | B | BA9 | ✓ | ✓ | ✓ |
| MK361094 | Taiwan/2016       | B | BA9 | ✓ | ✓ | ✓ |
| KY711305 | Saudi Arabia/2016 | B | BA9 | ✓ | ✓ | ✓ |
| KY711306 | Saudi Arabia/2016 | B | BA9 | ✓ | ✓ | ✓ |
| KY711307 | Saudi Arabia/2016 | B | BA9 | ✓ | ✓ | ✓ |
